# Supplementary material for: A 2D/2D heterojunction of ultrathin Pd nanosheet/MXene towards highly efficient methanol oxidation reaction: the significance of 2D material nanoarchitectonics
Source: Royal Society of Chemistry journal article supplement (doi:10.1039/d3sc03735e), 2023-01-01
Supplement: d3sc03735e1.pdf [file d3sc03735e1.pdf]

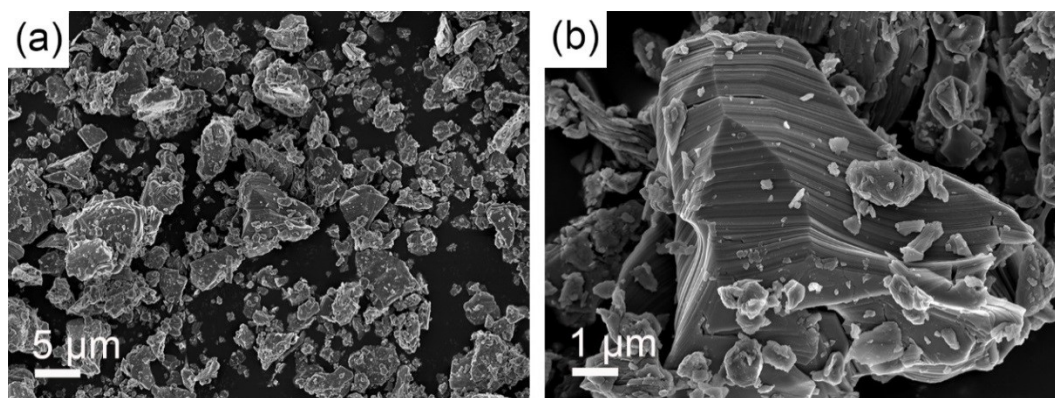

**Fig. S1** Representative FE-SEM images of  $\text{Ti}_3\text{AlC}_2$  powders at different magnifications.

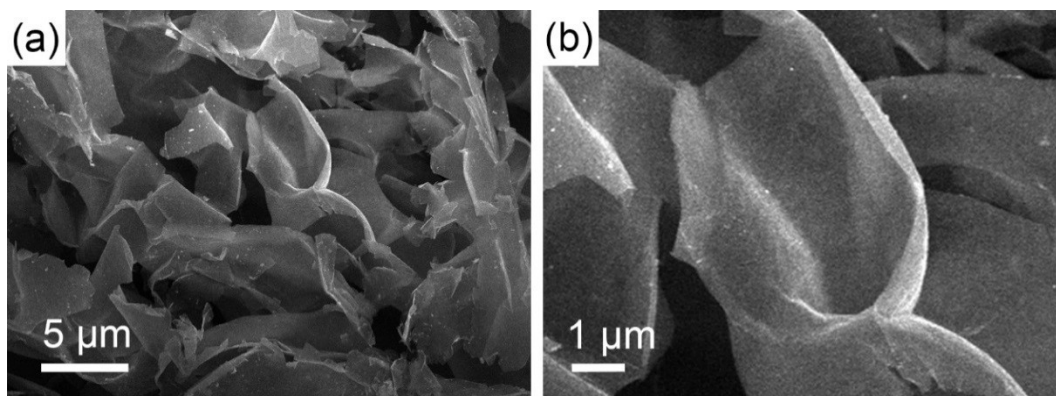

**Fig. S2** Representative FE-SEM images of exfoliated  $\text{Ti}_3\text{C}_2\text{T}_x$  nanosheets show their 2D layer structure.

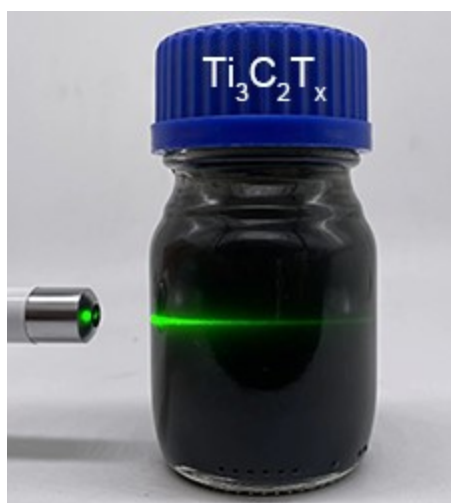

**Fig. S3** The Tyndall phenomenon of the as-obtained  $\text{Ti}_3\text{C}_2\text{T}_x$  MXene suspension.

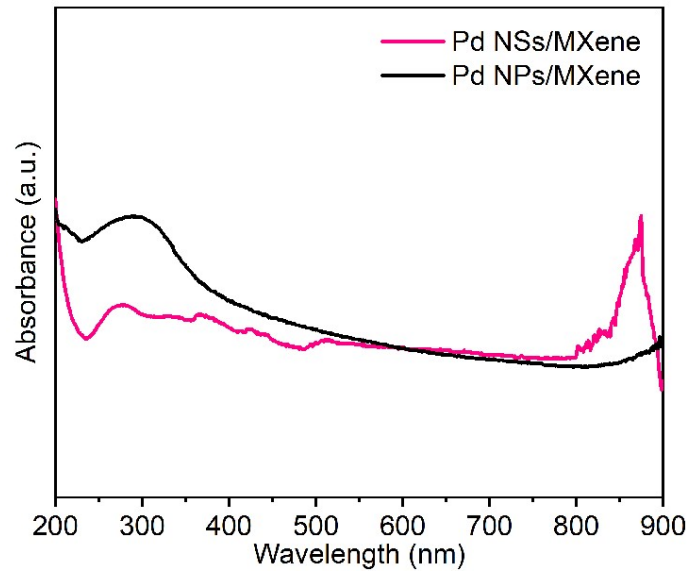

**Fig. S4** UV-vis absorption spectra of the Pd NSs/MXene and Pd NPs/MXene samples.

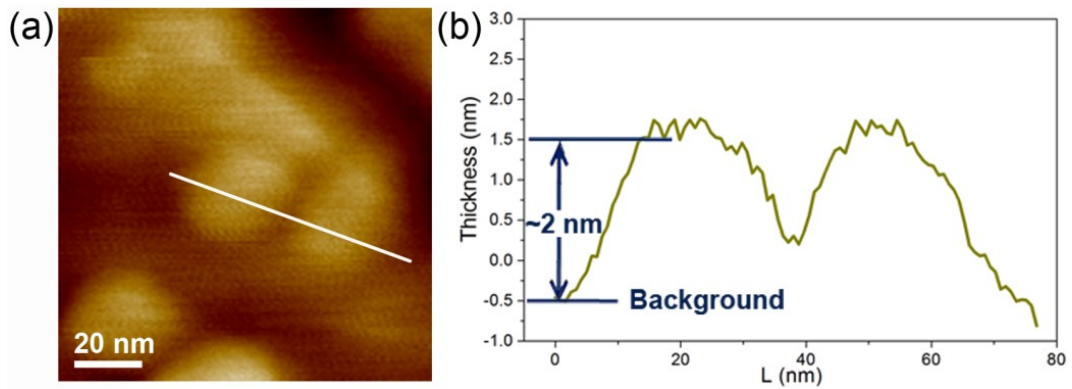

**Fig. S5** (a) AFM image of the Pd NSs/MXene heterojunction. (b) The thickness analysis along the white line.

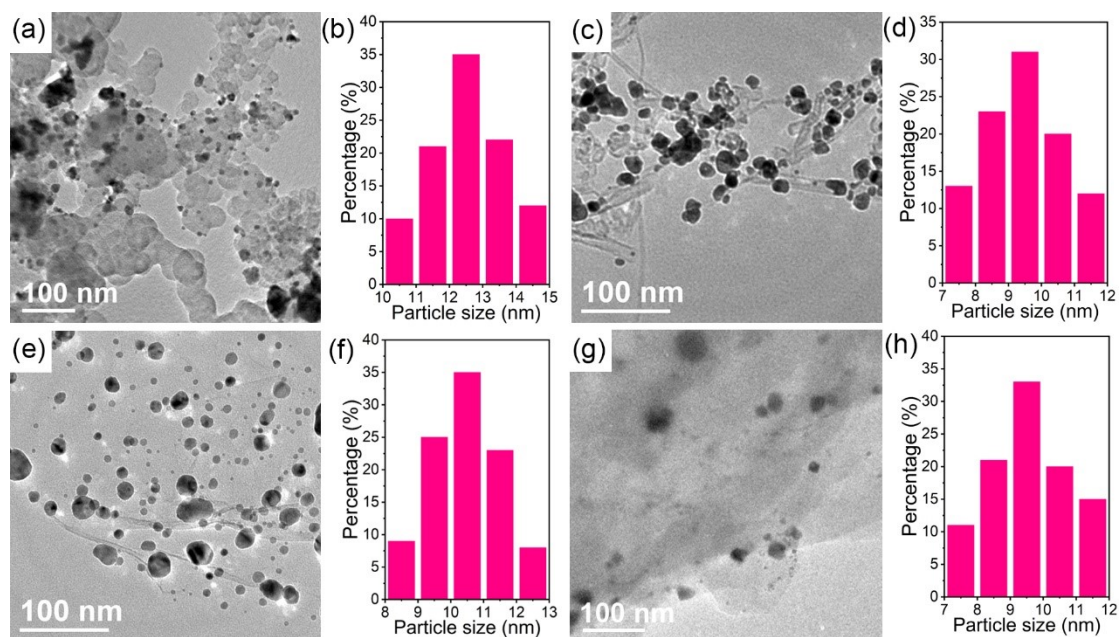

**Fig. S6** TEM analysis of the reference hybrid catalysts. Typical TEM images and Pd particle size distribution of (a, b) Pd NPs/C, (c, d) Pd NPs/CNT, (e, f) Pd NPs/RGO, and (g, h) Pd NPs/MXene.

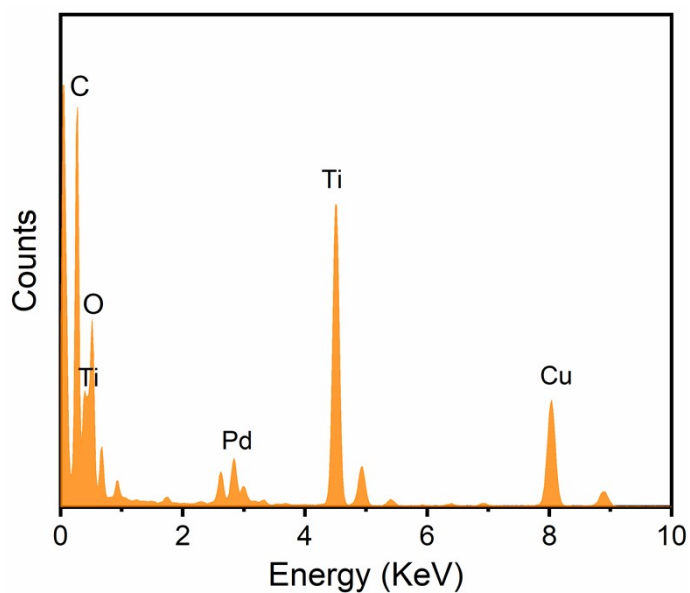

**Fig. S7** EDX spectrum of the Pd NSs/MXene catalyst verifies the presence of C, Ti, O, and Pd components in the hybrid. The sample was held on a Cu grid, thus Cu peaks were also detected.

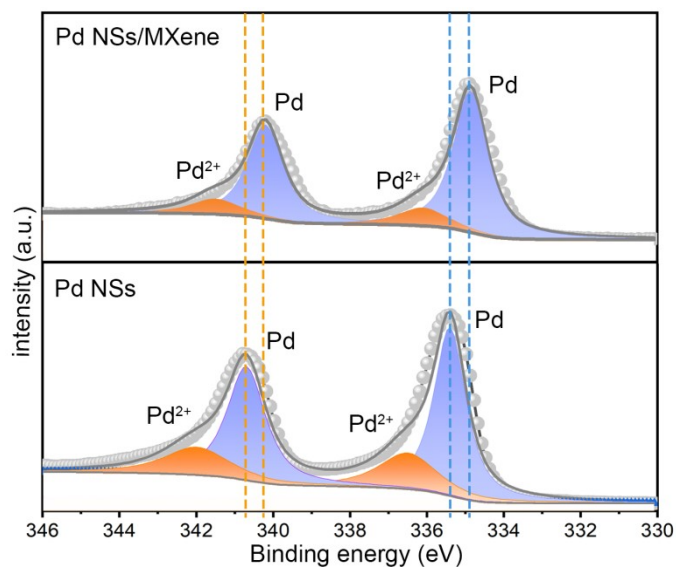

**Fig. S8** Comparison of the binding energies for Pd 3d spectra of Pd NSs/MXene with bare Pd NSs.

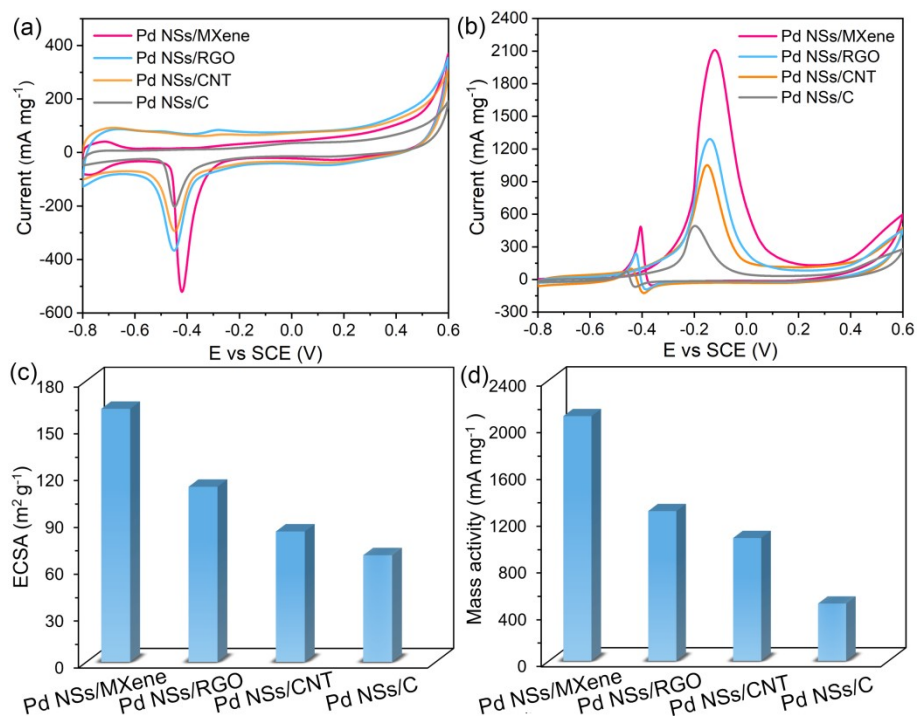

**Fig. S9** Typical CV curves of the Pd NSs/MXene, Pd NSs/RGO, Pd NSs/CNT, and Pd NSs/C electrodes in (a) 0.5 M NaOH solution and (b) 0.5 M NaOH with 1 M CH<sub>3</sub>OH solution at 50 mV s<sup>-1</sup>. (c) Specific ECSA values and (d) mass activities for various electrodes.

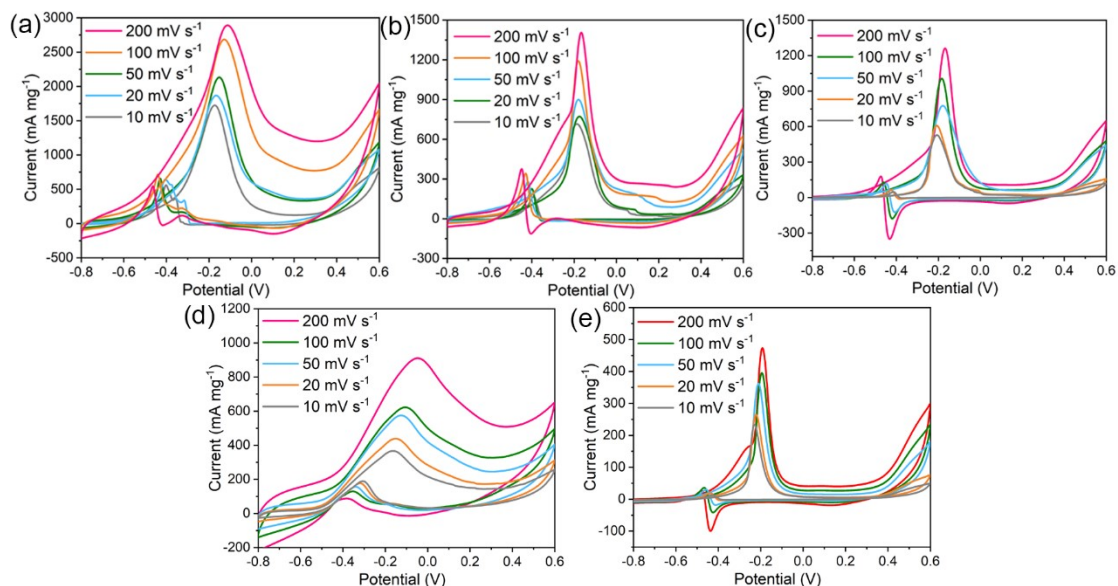

**Fig. S10** CV curves of (a) Pd NSs/MXene, (b) Pd NPs/MXene, (c) Pd NPs/RGO, (d) Pd NPs/CNT, and (e) Pd NPs/C in 0.5 M NaOH with 1 M CH<sub>3</sub>OH solution with scan rates of 10, 20, 50, 100 and 200 mV s<sup>-1</sup>.

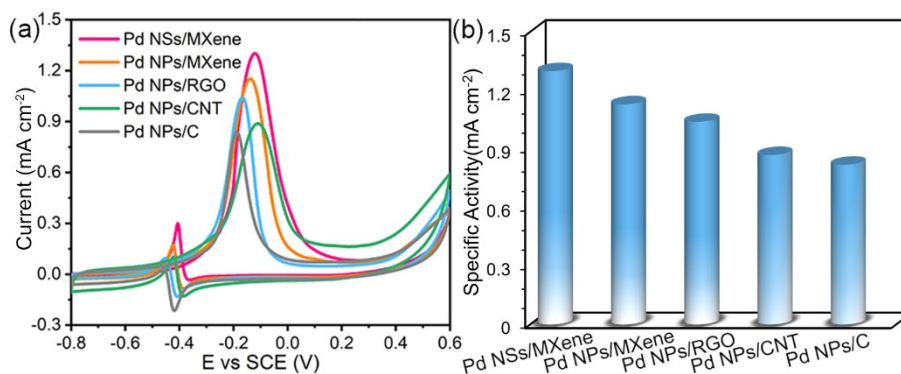

**Fig. S11** (a) ECSA-normalized CV curves of the Pd NSs/MXene and other reference catalysts in 0.5 M NaOH with 1 M CH<sub>3</sub>OH solution at 50 mV s<sup>-1</sup>. (b) ECSA-normalized specific activities for different catalysts.

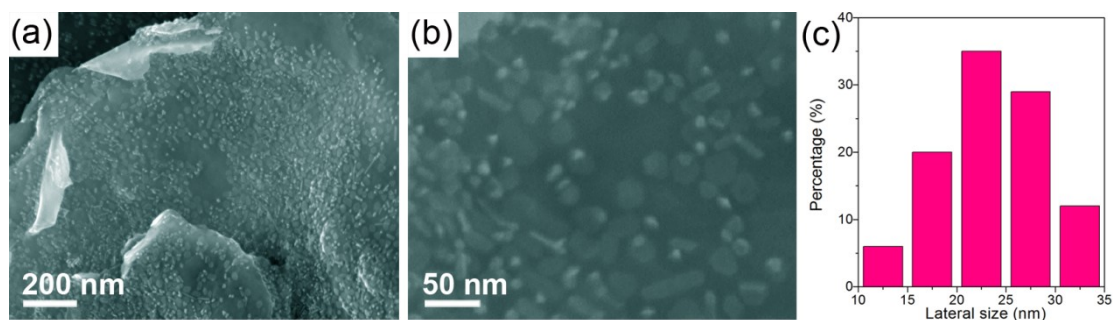

**Fig. S12** (a-b) FE-SEM images and the (c) corresponding Pd lateral size distribution of the Pd NSs/MXene catalyst after the long-term durability test.

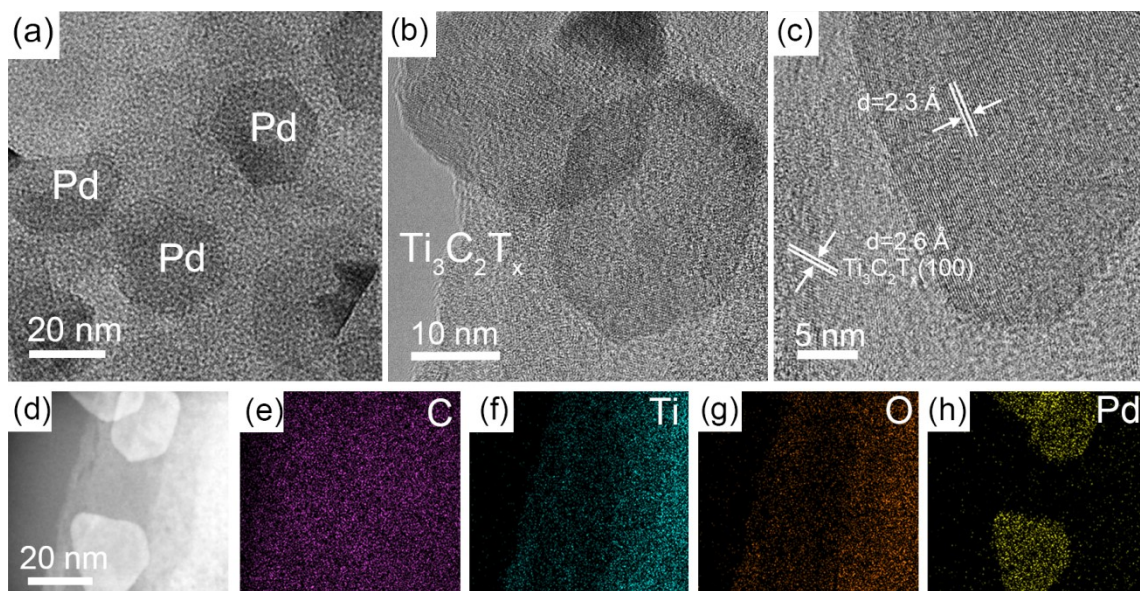

**Fig. S13** (a, b) TEM, (c) HR-TEM, (d) HAADF-STEM images and elemental analysis of (e) C, (f) Ti, (g) O, and (h) Pd elements of the Pd NSs/MXene catalyst after the long-term durability test.

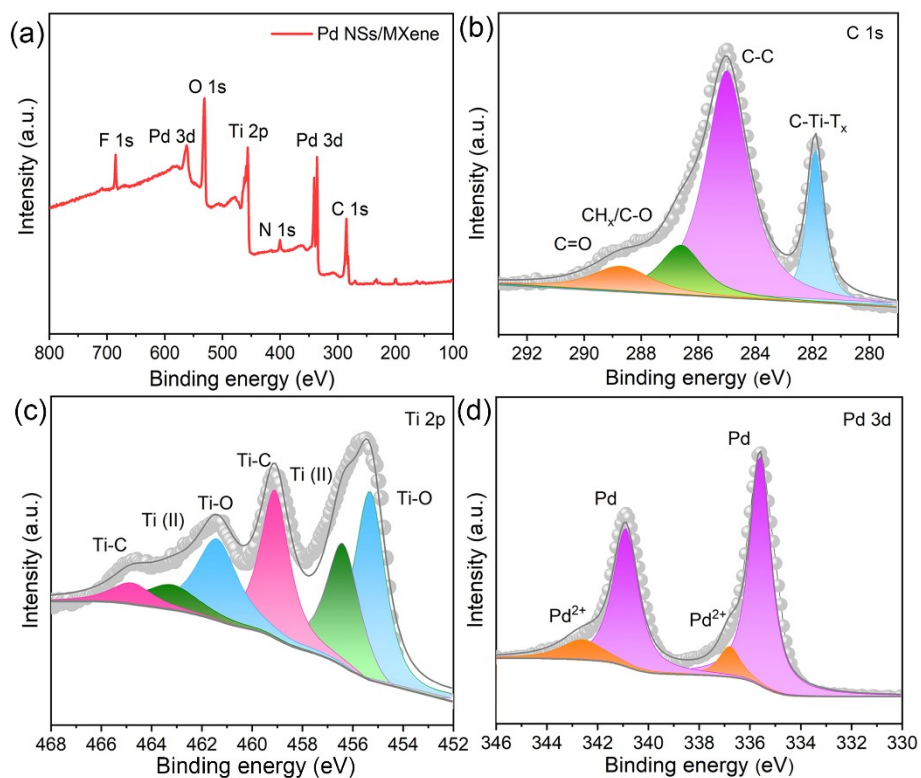

**Fig. S14** (a) XPS survey, (b) C 1s, (c) Ti 2p, and (d) Pd 3d core-level spectra of the Pd NSs/MXene catalyst after the long-term durability test.

**Table S1.** Summary of CV results for different catalysts.

| Catalyst     | ECSA<br>(m <sup>2</sup> g <sup>-1</sup> ) | Mass activity (mA<br>mg <sup>-1</sup> ) | Specific activity<br>(mA cm <sup>-2</sup> ) | Scan rate<br>(mV s <sup>-1</sup> ) |
|--------------|-------------------------------------------|-----------------------------------------|---------------------------------------------|------------------------------------|
| Pd NSs/MXene | 162.0                                     | 2091.4                                  | 1.30                                        | 50                                 |
| Pd NSs/RGO   | 112.1                                     | 1281.5                                  | 1.14                                        | 50                                 |
| Pd NSs/CNT   | 83.5                                      | 1049.2                                  | 1.25                                        | 50                                 |
| Pd NSs/C     | 68.3                                      | 493.5                                   | 0.72                                        | 50                                 |
| Pd NPs/MXene | 82.2                                      | 934.1                                   | 1.13                                        | 50                                 |
| Pd NPs/RGO   | 75.0                                      | 780.9                                   | 1.04                                        | 50                                 |
| Pd NPs/CNT   | 64.2                                      | 569.9                                   | 0.87                                        | 50                                 |
| Pd NPs/C     | 41.2                                      | 345.5                                   | 0.82                                        | 50                                 |

**Table S2.** Comparison of methanol oxidation properties for the Pd NSs/MXene catalyst with various recent state-of-the-art Pd-based catalysts.

| Catalyst                                    | ECSA<br>(m <sup>2</sup> g <sup>-1</sup> ) | Mass activity<br>(mA mg <sup>-1</sup> ) | Scan rate<br>(mV s <sup>-1</sup> ) | Electrolyte                              | Ref.         |
|---------------------------------------------|-------------------------------------------|-----------------------------------------|------------------------------------|------------------------------------------|--------------|
| Pd NSs/MXene                                | 162.0                                     | 2091.4                                  | 50                                 | 0.5 M NaOH +<br>1.0 M CH <sub>3</sub> OH | This<br>work |
| PdAg/CNT                                    | 27.0                                      | 731.0                                   | 50                                 | 1 M KOH +<br>0.5 M CH <sub>3</sub> OH    | 49           |
| Pd/APZ-functionalized<br>CNTs               | 42.3                                      | 579.2                                   | 50                                 | 0.5 M NaOH +<br>1.0 M CH <sub>3</sub> OH | 50           |
| Pd/N-doped graphitic<br>carbon nanosheets   | 136.7                                     | 816.5                                   | 50                                 | 0.5 M NaOH +<br>1.0 M CH <sub>3</sub> OH | 51           |
| Pd/N,S-codoped<br>graphene                  | 103.6                                     | 399.3                                   | 50                                 | 0.5 M NaOH +<br>1.0 M CH <sub>3</sub> OH | 52           |
| Pd/MnO <sub>2</sub> -modified<br>graphene   | 82.6                                      | 838.0                                   | 50                                 | 0.5 M NaOH +<br>1.0 M CH <sub>3</sub> OH | 53           |
| Pd/CoMoO <sub>4</sub> -modified<br>graphene | 50.5                                      | 1109.3                                  | 50                                 | 1 M KOH +<br>1 M CH <sub>3</sub> OH      | 54           |
| Pd/3D B,N-codoped<br>graphene               | 82.1                                      | 707.5                                   | 50                                 | 0.5 M NaOH +<br>1.0 M CH <sub>3</sub> OH | 33           |
| Pd/3D N-doped<br>graphene-CNT               | 88.8                                      | 1396.0                                  | 50                                 | 0.5 M NaOH +<br>1.0 M CH <sub>3</sub> OH | 31           |
| Pd@RhPd alloy<br>nanodendrites              | 15.5                                      | 437.5                                   | 50                                 | 1 M KOH +<br>0.5 M CH <sub>3</sub> OH    | 55           |
| PdCu nanodendrites                          | 24.8                                      | 135                                     | 50                                 | 0.1 M KOH +<br>0.5 M CH <sub>3</sub> OH  | 56           |
| PdAu nanowires                              | 59.1                                      | N.A.                                    | 50                                 | 0.5 M NaOH +<br>1.0 M CH <sub>3</sub> OH | 57           |
| PdCo nanowires                              | 33.6                                      | 1205                                    | 50                                 | 1 M KOH +<br>0.5 M CH <sub>3</sub> OH    | 58           |



**Table S3.** The charge-transfer resistances of the Pd NSs/MXene, Pd NPs/MXene, Pd NPs/RGO, Pd NPs/CNT, and Pd NPs/C electrodes.

| Catalyst     | $R_{ct}$ value ( $\Omega$ ) | Error (%) |
|--------------|-----------------------------|-----------|
| Pd NSs/MXene | 7.9                         | 4.2       |
| Pd NPs/MXene | 17.9                        | 5.1       |
| Pd NPs/RGO   | 21.4                        | 4.8       |
| Pd NPs/CNT   | 22.1                        | 5.8       |
| Pd NPs/C     | 6875.1                      | 4.5       |
